# Supplementary material for: Antitumor Effects of Ononin by Modulation of Apoptosis in Non‐Small‐Cell Lung Cancer through Inhibiting PI3K/Akt/mTOR Pathway
Source: Hindawi journal article supplement (doi:10.1155/2022/5122448), 2022-01-01

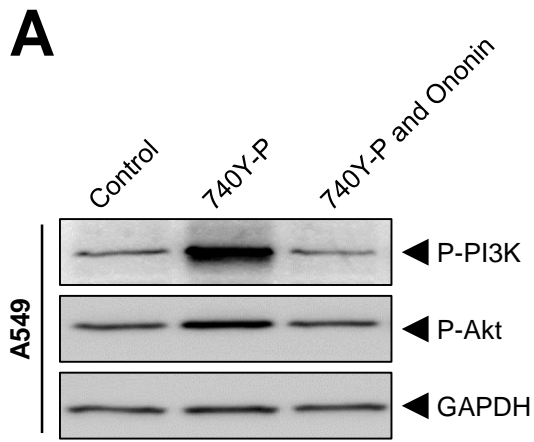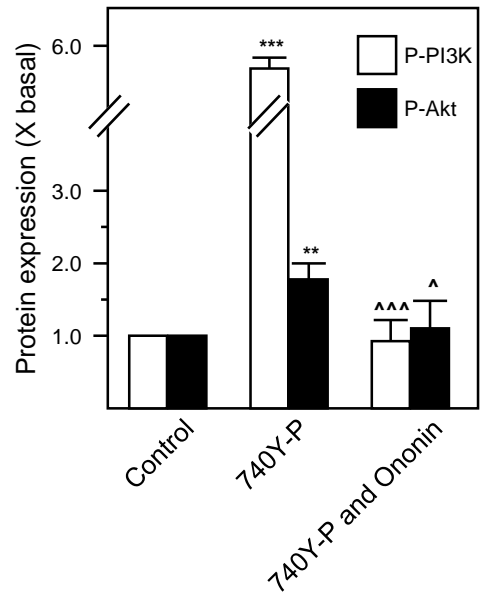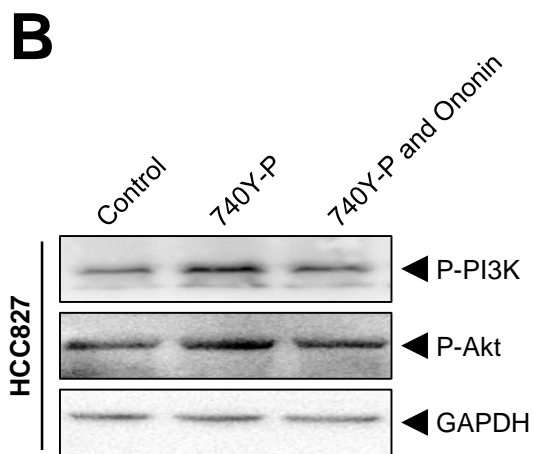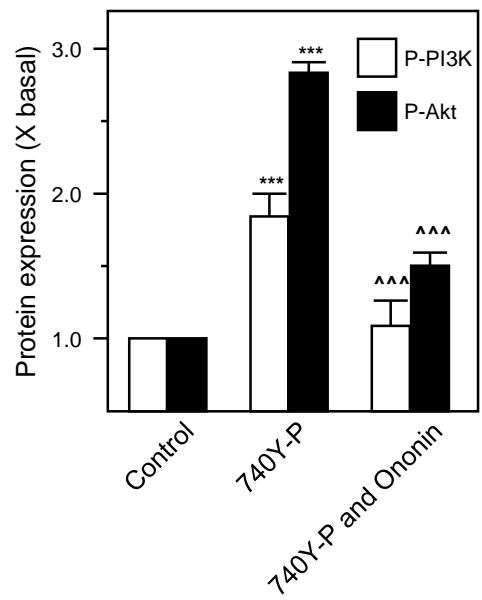

Supplement: f1 [file 5122448.f1.pdf]
